# Supplementary material for: Demonstration of all-or-none loss of imprinting in mRNA expression in single cells
Source: PubMed Central journal article supplement — Nucleic Acids Res. 2009 Sep 18;37(21):7039–46. doi: 10.1093/nar/gkp749 (PMC2790885; doi:10.1093/nar/gkp749), 2009-09-18
Supplement: gkp749_1.pdf [file gkp749_1.pdf]

Supplementary Table 1. Primer sets designed for PCR amplicon synthesis and qASPCR

| <b>PCR amplicon synthesis</b>   |                                                                                                                                                           |
|---------------------------------|-----------------------------------------------------------------------------------------------------------------------------------------------------------|
| <i>PLAGL1</i> F                 | TGCATGTTAGAAGAATCAGCCT                                                                                                                                    |
| <i>PLAGL1</i> R                 | TGAGTCAGTTAGGTCAGTGTAGAGAGA                                                                                                                               |
| <i>ZNF331</i> F                 | CGCTCCAGAGGGAGGTATGT                                                                                                                                      |
| <i>ZNF331</i> R                 | AAAGGCCTTCCCACAGTCCT                                                                                                                                      |
| <i>ACTB</i> F                   | ACTGGAACGGTGAAGGTGAC                                                                                                                                      |
| <i>ACTB</i> R                   | GTGGACTTGGGAGAGGACTG                                                                                                                                      |
| <b>qASPCR</b>                   |                                                                                                                                                           |
| <i>PLAGL1</i> F                 | TGCATGTTAGAAGAATCAGCCT                                                                                                                                    |
| <i>PLAGL1</i> R*                | GTTCCCCAGTCTGTTTTTGGGA(C/T)                                                                                                                               |
| <i>ZNF331</i> F                 | CGCTCCAGAGGGAGGTATGT                                                                                                                                      |
| <i>ZNF331</i> R*                | GTGCCTTCTCTAGTAGCAGG(T/C)                                                                                                                                 |
| <b>Control oligonucleotides</b> |                                                                                                                                                           |
| <i>PLAGL1</i>                   | TGCATGTTAGAAGAATCAGCCTGGCAAAGCAAAGCATTGTGA<br>TTAGAATGAAGGGGAACCCAGGTAAAACAGACTGGGGAACC<br>AATATGGATCTGCCTCTAGCATGCGGAAATATCTCTCTACACT<br>GACCTAACTGACTCA |
| <i>ZNF331</i>                   | ATATGTGAAGGTACGCTTGAAAGACCACAGCGCTCCAGAGGG<br>AGGTATGTCAATCAGATGATCATCAATTATGTCAAAAGGCTA<br>CTAGAGAAGGCACCCCTCCTAA                                        |

\* Allele-specific primers appear with the alternative allele-specific nucleotides at the 3' end in parentheses

Supplementary Table 2. Calculation of mean and standard deviation of LOI distribution of cells exhibiting LOI. 10%, 20% or 35% error cutoff were used to exclude the cells with mono-allelic expression.

| cutoff error% | treatment  | mean LOI% | stdev |
|---------------|------------|-----------|-------|
| 10%           | AZA 0 day  | 60%       | 6.5%  |
|               | AZA 1 day  | 93.5%     | 8.9%  |
|               | AZA 2 days | 89%       | 6.4%  |
| 20%           | AZA 0 day  | 73%       | 7.1%  |
|               | AZA 1 day  | 95.7%     | 8.3%  |
|               | AZA 2 days | 97.6%     | 6.1%  |
| 35%           | AZA 0 day  | 87%       | 7.4%  |
|               | AZA 1 day  | 97.2%     | 7.3%  |
|               | AZA 2 days | 92.3%     | 5.8%  |

Supplementary Table 3. Accuracy of LOI measurements with different DNA copy numbers.

| DNA concentration | LOI (%) (S.D. %) | LOI range (low, high) |
|-------------------|------------------|-----------------------|
| 20 ng             | 10.0 (1.0)       | (9.0, 11.0)           |
| 2 ng              | 8.0 (3.0)        | (5.0, 11.0)           |
| 200 pg            | 13.0 (3.0)       | (10.0, 16.0)          |
| 100 pg            | 13.0 (4.0)       | (9.0, 17.0)           |
| 50 pg             | 13.0 (10.0)      | (3.0, 23.0)           |
| 20 pg             | 16.0 (10.0)      | (6.0, 26.0)           |

Supplementary Figure 1. Simulation of all-or-none LOI and partial LOI models in single cells. **A.** Simulation of single cell LOI distribution with consideration of transcriptional pulsing efficiency as a Gaussian random variable. Left panel: all-or-none model; Right panel: alternative model. **B.** Simulation of single cell LOI distribution of cells with consideration of only the cells in the top 25% of total mRNA copies. Left panel: all-or-none model; Right panel: alternative model.
